# Supplementary material
Source: PubMed Central journal article supplement (PMC3268335)
Supplement: 1112204109_pnas.201112204SI.pdf [file 1112204109_pnas.201112204SI.pdf]

# Supporting Information

Ranson et al. 10.1073/pnas.1112204109

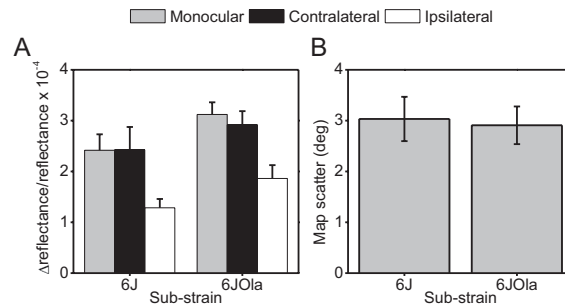

**Fig. S1.** In vivo intrinsic signal imaging shows similar V1 intrinsic signal response magnitude and retinotopic map in the 6J and 6JOla substrains. (A) The absolute intrinsic signal response magnitude is similar in control animals of the two substrains. (B) Retinotopic map scatter is comparable in the two substrains.  $\Delta R/R$  ( $R$ , reflectance) and scatter values are shown as mean  $\pm$  SEM.

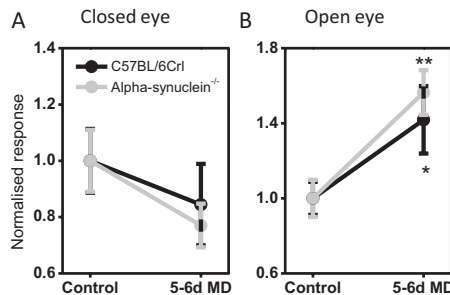

**Fig. S2.** In vivo intrinsic signal imaging shows a normal late homeostatic component of OD plasticity in  $\alpha$ -synuclein KO mice. OD plasticity is comparable in animals with  $\alpha$ -synuclein and without  $\alpha$ -synuclein. (A) Closed eye. (B) Open eye. 6CrI: control,  $n = 9$ ; 5–6 d MD,  $n = 6$ .  $\alpha$ -synuclein: control,  $n = 5$ ; 5–6 d MD,  $n = 5$ . \*\* $P < 0.01$ ; \* $P < 0.05$ . Response values are shown as mean response normalized to control value  $\pm$  SEM.

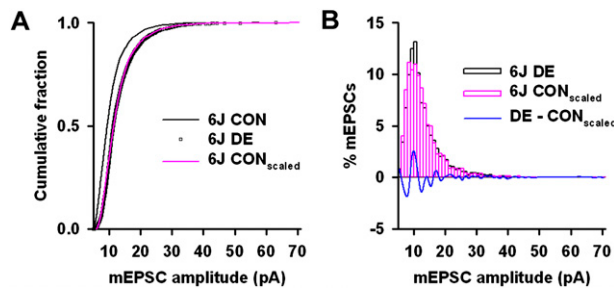

**Fig. S3.** Dark exposure (DE) results in multiplicative scaling of mEPSC amplitudes in 6J mice. (A) Cumulative distribution plot showing the effect of DE on raw mEPSC amplitude for 6J mice.  $n = 50$  mEPSCs/neuron. The scaled distribution (6J CON<sub>scaled</sub>) was generated by multiplying 6J control (CON) values by 1.22, the difference in mean mEPSC amplitude between 6J control and 6J dark-exposed groups. (B) Histogram showing the distribution of raw mEPSC amplitudes for 6J dark-exposed and 6J CON<sub>scaled</sub> groups. mEPSC amplitudes are shown in 1-ms bins. The blue line indicates the difference between the 6J dark-exposed and 6J CON<sub>scaled</sub> distributions (CON<sub>scaled</sub> subtracted from DE).

**Table S1. Dark exposure (DE) does not affect passive properties of L2/3 pyramidal neurons**

|                    | Resting membrane potential at break-in, mV | Input resistance, M $\Omega$ |
|--------------------|--------------------------------------------|------------------------------|
| 6J control         | -77 $\pm$ 1                                | 71 $\pm$ 9                   |
| 6J dark-exposed    | -77 $\pm$ 0                                | 88 $\pm$ 6                   |
| 6JOla control      | -76 $\pm$ 1                                | 79 $\pm$ 9                   |
| 6JOla dark-exposed | -77 $\pm$ 1                                | 85 $\pm$ 11                  |

Data are shown as grand mean  $\pm$  SEM. There was no difference in resting membrane potential among the groups (effect of strain:  $P = 0.20$ ,  $F_{1,20} = 1.79$ ; effect of DE:  $P = 0.55$ ,  $F_{1,20} = 0.38$ ; interaction:  $P = 1.00$ ,  $F_{1,20} = 0.00$ ; two-way ANOVA). There also was no difference in input resistance between groups (effect of strain:  $P = 0.78$ ,  $F_{1,20} = 0.08$ ; effect of DE:  $P = 0.23$ ,  $F_{1,20} = 1.51$ ; interaction:  $P = 0.60$ ,  $F_{1,20} = 0.29$ ; two-way ANOVA).
